# Supplementary material
Source: ML conference proceedings conference paper supplement (https://www.ecva.net/papers/eccv_2020/papers_ECCV/html/123500409_ECCV_2020_paper.php)
Supplement: Supplementary file 2 [file 123500409-supp.zip › 3601-supp/README.txt]

This supplementary package contains three files:

1. This README file that briefly introduces the content of the supplementary materials and provides the necessary instructions;

2. The main document "3601-supp.pdf", which includes additional analyses, results and details on the video file.

3. A video file "3601-video.mp4", which shows additional qualitative comparisons.

Instructions:

The video is generated with codec x264/H.264, which can be downloaded from https://www.videolan.org/developers/x264.html.

Thank you for your consideration.
